# Supplementary material for: Biological Networks for Predicting Chemical Hepatocarcinogenicity Using Gene Expression Data from Treated Mice and Relevance across Human and Rat Species
Source: PLoS One. 2013 May 30;8(5):e63308. doi: 10.1371/journal.pone.0063308 (PMC3667849; doi:10.1371/journal.pone.0063308)
Supplement: Table S1 — List of rat hepatocarcinogen treatment groups from Auerbach et al., 2009. (XLS) [file pone.0063308.s003.xls]

## Sheet: S1
Supplementary Table 1. Chemical treatment groups from a liver genomics study of F344N male rats (Auerbach et al. 2009) which was used to test cross-species predictivity
Chemical	Abreviation	Route	Dose (mg/kg/day)	Liver Tumors	Class
1-Amino-2,4-dibromoanthraquinone	DBAQ	Dose-feed	409	Yes	Hepatocarcinogen
Aflatoxin B1	AFB1	Dose-feed	0.1	Yes	Hepatocarcinogen
Methyleugenol	MEGH	Corn oil gavage	150	Yes	Hepatocarcinogen
N-nitrosodimethylamine	NMDA	Drinking water	0.4	Yes	Hepatocarcinogen
Acetominophen	APAP	Drinking water	242	No	Non-hepatocarcinogen
Tryptophan	TYP	Dose-feed	1994	No	Non-hepatocarcinogen
Vitamin C	VtC	Dose-feed	409.4	No	Non-hepatocarcinogen
Methyleugenol	MEG-L	Corn oil gavage	35.6	Yes	Hepatocarcinogen
Methyleugenol	MEG-H	Corn oil gavage	356	Yes	Hepatocarcinogen
Estragole	ESG-L	Corn oil gavage	29.6	Yes	Hepatocarcinogen
Estragole	ESG-H	Corn oil gavage	296	Yes	Hepatocarcinogen
Safrole	SAF-L	Corn oil gavage	32.4	Yes	Hepatocarcinogen
Safrole	SAF-H	Corn oil gavage	324	Yes	Hepatocarcinogen
Eugenol	EGN-L	Corn oil gavage	32.8	No	Non-hepatocarcinogen
Eugenol	EGN-H	Corn oil gavage	328	No	Non-hepatocarcinogen
Isoeugenol	IGN-L	Corn oil gavage	32.8	No	Non-hepatocarcinogen
Isoeugenol	IGN-H	Corn oil gavage	328	No	Non-hepatocarcinogen
Anethole	ANT-L	Corn oil gavage	29.6	No	Non-hepatocarcinogen
Anethole	ANT-H	Corn oil gavage	296	No	Non-hepatocarcinogen
Myristicin	MYR-L	Corn oil gavage	38.4	Untested	Untested
Myristicin	MYR-H	Corn oil gavage	384	Untested	Untested
Isosafrole	ISF-L	Corn oil gavage	32.4	Untested	Untested
Isosafrole	ISF-H	Corn oil gavage	324	Untested	Untested
