# Supplementary material for: Biological Networks for Predicting Chemical Hepatocarcinogenicity Using Gene Expression Data from Treated Mice and Relevance across Human and Rat Species
Source: PLoS One. 2013 May 30;8(5):e63308. doi: 10.1371/journal.pone.0063308 (PMC3667849; doi:10.1371/journal.pone.0063308)
Supplement: Table S2 — List of chemicals in Table 1 that were chosen to be in each of the 5 folds in the cross-validation analysis performed. (XLS) [file pone.0063308.s004.xls]

## Sheet: S4
Supplementary Table 8. The list of pathways used as predictors along with their importance measures
SNO	KEGG ID	Pathway description	Importance
56	path:mmu00590	Arachidonic acid metabolism - Mus musculus (mouse)	1.92899
83	path:mmu00982	Drug metabolism - cytochrome P450 - Mus musculus (mouse)	1.62282
76	path:mmu00830	Retinol metabolism - Mus musculus (mouse)	1.45049
181	path:mmu05014	Amyotrophic lateral sclerosis (ALS) - Mus musculus (mouse)	1.29493
64	path:mmu00630	Glyoxylate and dicarboxylate metabolism - Mus musculus (mouse)	1.14612
4	path:mmu00040	Pentose and glucuronate interconversions - Mus musculus (mouse)	1.13332
7	path:mmu00053	Ascorbate and aldarate metabolism - Mus musculus (mouse)	1.12924
88	path:mmu03010	Ribosome - Mus musculus (mouse)	1.1122
15	path:mmu00140	Steroid hormone biosynthesis - Mus musculus (mouse)	1.09047
61	path:mmu00603	Glycosphingolipid biosynthesis - globo series - Mus musculus (mouse)	1.04094
44	path:mmu00514	O-Mannosyl glycan biosynthesis - Mus musculus (mouse)	1.01898
122	path:mmu04210	Apoptosis - Mus musculus (mouse)	1.01041
90	path:mmu03020	RNA polymerase - Mus musculus (mouse)	1.00524
68	path:mmu00730	Thiamine metabolism - Mus musculus (mouse)	1.00434
104	path:mmu04020	Calcium signaling pathway - Mus musculus (mouse)	0.990999
158	path:mmu04740	Olfactory transduction - Mus musculus (mouse)	0.989334
199	path:mmu05216	Thyroid cancer - Mus musculus (mouse)	0.984922
31	path:mmu00380	Tryptophan metabolism - Mus musculus (mouse)	0.973899
43	path:mmu00512	O-Glycan biosynthesis - Mus musculus (mouse)	0.951521
5	path:mmu00051	Fructose and mannose metabolism - Mus musculus (mouse)	0.934186
123	path:mmu04260	Cardiac muscle contraction - Mus musculus (mouse)	0.907628
161	path:mmu04810	Regulation of actin cytoskeleton - Mus musculus (mouse)	0.875569
157	path:mmu04730	Long-term depression - Mus musculus (mouse)	0.860254
171	path:mmu04962	Vasopressin-regulated water reabsorption - Mus musculus (mouse)	0.845047
108	path:mmu04080	Neuroactive ligand-receptor interaction - Mus musculus (mouse)	0.835104
16	path:mmu00190	Oxidative phosphorylation - Mus musculus (mouse)	0.823239
105	path:mmu04060	Cytokine-cytokine receptor interaction - Mus musculus (mouse)	0.80603
184	path:mmu05100	Bacterial invasion of epithelial cells - Mus musculus (mouse)	0.778499
87	path:mmu02010	ABC transporters - Mus musculus (mouse)	0.770416
70	path:mmu00750	Vitamin B6 metabolism - Mus musculus (mouse)	0.755716
67	path:mmu00670	One carbon pool by folate - Mus musculus (mouse)	0.746409
154	path:mmu04710	Circadian rhythm - mammal - Mus musculus (mouse)	0.744659
125	path:mmu04310	Wnt signaling pathway - Mus musculus (mouse)	0.74354
121	path:mmu04150	mTOR signaling pathway - Mus musculus (mouse)	0.731263
71	path:mmu00760	Nicotinate and nicotinamide metabolism - Mus musculus (mouse)	0.698385
200	path:mmu05217	Basal cell carcinoma - Mus musculus (mouse)	0.694689
3	path:mmu00030	Pentose phosphate pathway - Mus musculus (mouse)	0.692941
165	path:mmu04916	Melanogenesis - Mus musculus (mouse)	0.690132
57	path:mmu00591	Linoleic acid metabolism - Mus musculus (mouse)	0.687356
82	path:mmu00980	Metabolism of xenobiotics by cytochrome P450 - Mus musculus (mouse)	0.677185
120	path:mmu04146	Peroxisome - Mus musculus (mouse)	0.674793
173	path:mmu04966	Collecting duct acid secretion - Mus musculus (mouse)	0.667493
59	path:mmu00600	Sphingolipid metabolism - Mus musculus (mouse)	0.653527
41	path:mmu00510	N-Glycan biosynthesis - Mus musculus (mouse)	0.6528
196	path:mmu05213	Endometrial cancer - Mus musculus (mouse)	0.649242
124	path:mmu04270	Vascular smooth muscle contraction - Mus musculus (mouse)	0.645375
170	path:mmu04960	Aldosterone-regulated sodium reabsorption - Mus musculus (mouse)	0.633818
127	path:mmu04330	Notch signaling pathway - Mus musculus (mouse)	0.631423
183	path:mmu05020	Prion diseases - Mus musculus (mouse)	0.61421
147	path:mmu04650	Natural killer cell mediated cytotoxicity - Mus musculus (mouse)	0.610131
118	path:mmu04144	Endocytosis - Mus musculus (mouse)	0.608581
187	path:mmu05144	Malaria - Mus musculus (mouse)	0.602536
69	path:mmu00740	Riboflavin metabolism - Mus musculus (mouse)	0.600416
30	path:mmu00360	Phenylalanine metabolism - Mus musculus (mouse)	0.595684
80	path:mmu00920	Sulfur metabolism - Mus musculus (mouse)	0.58601
99	path:mmu03430	Mismatch repair - Mus musculus (mouse)	0.582026
97	path:mmu03410	Base excision repair - Mus musculus (mouse)	0.581925
150	path:mmu04664	Fc epsilon RI signaling pathway - Mus musculus (mouse)	0.580355
203	path:mmu05220	Chronic myeloid leukemia - Mus musculus (mouse)	0.576757
73	path:mmu00780	Biotin metabolism - Mus musculus (mouse)	0.571994
79	path:mmu00910	Nitrogen metabolism - Mus musculus (mouse)	0.564851
29	path:mmu00350	Tyrosine metabolism - Mus musculus (mouse)	0.560049
101	path:mmu03450	Non-homologous end-joining - Mus musculus (mouse)	0.557972
193	path:mmu05210	Colorectal cancer - Mus musculus (mouse)	0.557572
50	path:mmu00534	Glycosaminoglycan biosynthesis - heparan sulfate - Mus musculus (mouse)	0.557166
27	path:mmu00330	Arginine and proline metabolism - Mus musculus (mouse)	0.555994
206	path:mmu05223	Non-small cell lung cancer - Mus musculus (mouse)	0.552606
51	path:mmu00561	Glycerolipid metabolism - Mus musculus (mouse)	0.548209
42	path:mmu00511	Other glycan degradation - Mus musculus (mouse)	0.544863
214	path:mmu05412	Arrhythmogenic right ventricular cardiomyopathy (ARVC) - Mus musculus (mouse)	0.543071
10	path:mmu00071	Fatty acid metabolism - Mus musculus (mouse)	0.529451
94	path:mmu03050	Proteasome - Mus musculus (mouse)	0.523309
12	path:mmu00100	Steroid biosynthesis - Mus musculus (mouse)	0.523243
84	path:mmu00983	Drug metabolism - other enzymes - Mus musculus (mouse)	0.518796
215	path:mmu05414	Dilated cardiomyopathy - Mus musculus (mouse)	0.513831
100	path:mmu03440	Homologous recombination - Mus musculus (mouse)	0.511938
167	path:mmu04930	Type II diabetes mellitus - Mus musculus (mouse)	0.499372
174	path:mmu04970	Salivary secretion - Mus musculus (mouse)	0.490659
142	path:mmu04621	NOD-like receptor signaling pathway - Mus musculus (mouse)	0.489132
135	path:mmu04520	Adherens junction - Mus musculus (mouse)	0.488464
89	path:mmu03018	RNA degradation - Mus musculus (mouse)	0.48627
159	path:mmu04742	Taste transduction - Mus musculus (mouse)	0.48597
182	path:mmu05016	Huntington's disease - Mus musculus (mouse)	0.484842
65	path:mmu00640	Propanoate metabolism - Mus musculus (mouse)	0.482996
106	path:mmu04062	Chemokine signaling pathway - Mus musculus (mouse)	0.482809
155	path:mmu04720	Long-term potentiation - Mus musculus (mouse)	0.478223
52	path:mmu00562	Inositol phosphate metabolism - Mus musculus (mouse)	0.477652
85	path:mmu01040	Biosynthesis of unsaturated fatty acids - Mus musculus (mouse)	0.47706
138	path:mmu04610	Complement and coagulation cascades - Mus musculus (mouse)	0.471777
40	path:mmu00500	Starch and sucrose metabolism - Mus musculus (mouse)	0.465213
126	path:mmu04320	Dorso-ventral axis formation - Mus musculus (mouse)	0.458442
49	path:mmu00533	Glycosaminoglycan biosynthesis - keratan sulfate - Mus musculus (mouse)	0.449741
156	path:mmu04722	Neurotrophin signaling pathway - Mus musculus (mouse)	0.443668
98	path:mmu03420	Nucleotide excision repair - Mus musculus (mouse)	0.441201
28	path:mmu00340	Histidine metabolism - Mus musculus (mouse)	0.43605
54	path:mmu00564	Glycerophospholipid metabolism - Mus musculus (mouse)	0.435912
180	path:mmu05012	Parkinson's disease - Mus musculus (mouse)	0.433458
6	path:mmu00052	Galactose metabolism - Mus musculus (mouse)	0.427653
47	path:mmu00531	Glycosaminoglycan degradation - Mus musculus (mouse)	0.427553
112	path:mmu04120	Ubiquitin mediated proteolysis - Mus musculus (mouse)	0.421154
141	path:mmu04620	Toll-like receptor signaling pathway - Mus musculus (mouse)	0.417329
119	path:mmu04145	Phagosome - Mus musculus (mouse)	0.416747
48	path:mmu00532	Glycosaminoglycan biosynthesis - chondroitin sulfate - Mus musculus (mouse)	0.409162
140	path:mmu04614	Renin-angiotensin system - Mus musculus (mouse)	0.40852
103	path:mmu04012	ErbB signaling pathway - Mus musculus (mouse)	0.40411
77	path:mmu00860	Porphyrin and chlorophyll metabolism - Mus musculus (mouse)	0.403803
205	path:mmu05222	Small cell lung cancer - Mus musculus (mouse)	0.399219
113	path:mmu04122	Sulfur relay system - Mus musculus (mouse)	0.39285
38	path:mmu00472	D-Arginine and D-ornithine metabolism - Mus musculus (mouse)	0.390752
172	path:mmu04964	Proximal tubule bicarbonate reclamation - Mus musculus (mouse)	0.390214
201	path:mmu05218	Melanoma - Mus musculus (mouse)	0.38878
169	path:mmu04950	Maturity onset diabetes of the young - Mus musculus (mouse)	0.388703
23	path:mmu00280	Valine, leucine and isoleucine degradation - Mus musculus (mouse)	0.384691
185	path:mmu05140	Leishmaniasis - Mus musculus (mouse)	0.381244
107	path:mmu04070	Phosphatidylinositol signaling system - Mus musculus (mouse)	0.374617
63	path:mmu00620	Pyruvate metabolism - Mus musculus (mouse)	0.374445
177	path:mmu04973	Carbohydrate digestion and absorption - Mus musculus (mouse)	0.373526
37	path:mmu00471	D-Glutamine and D-glutamate metabolism - Mus musculus (mouse)	0.370427
111	path:mmu04115	p53 signaling pathway - Mus musculus (mouse)	0.366776
1	path:mmu00010	Glycolysis / Gluconeogenesis - Mus musculus (mouse)	0.363373
129	path:mmu04350	TGF-beta signaling pathway - Mus musculus (mouse)	0.362017
95	path:mmu03060	Protein export - Mus musculus (mouse)	0.359803
175	path:mmu04971	Gastric acid secretion - Mus musculus (mouse)	0.359624
93	path:mmu03040	Spliceosome - Mus musculus (mouse)	0.356887
102	path:mmu04010	MAPK signaling pathway - Mus musculus (mouse)	0.356477
189	path:mmu05146	Amoebiasis - Mus musculus (mouse)	0.355306
117	path:mmu04142	Lysosome - Mus musculus (mouse)	0.350353
20	path:mmu00250	Alanine, aspartate and glutamate metabolism - Mus musculus (mouse)	0.346452
39	path:mmu00480	Glutathione metabolism - Mus musculus (mouse)	0.337666
72	path:mmu00770	Pantothenate and CoA biosynthesis - Mus musculus (mouse)	0.335656
53	path:mmu00563	Glycosylphosphatidylinositol(GPI)-anchor biosynthesis - Mus musculus (mouse)	0.33385
36	path:mmu00460	Cyanoamino acid metabolism - Mus musculus (mouse)	0.332869
75	path:mmu00790	Folate biosynthesis - Mus musculus (mouse)	0.328787
188	path:mmu05145	Toxoplasmosis - Mus musculus (mouse)	0.328692
24	path:mmu00290	Valine, leucine and isoleucine biosynthesis - Mus musculus (mouse)	0.327666
194	path:mmu05211	Renal cell carcinoma - Mus musculus (mouse)	0.324964
137	path:mmu04540	Gap junction - Mus musculus (mouse)	0.323068
211	path:mmu05332	Graft-versus-host disease - Mus musculus (mouse)	0.320984
32	path:mmu00400	Phenylalanine, tyrosine and tryptophan biosynthesis - Mus musculus (mouse)	0.320868
213	path:mmu05410	Hypertrophic cardiomyopathy (HCM) - Mus musculus (mouse)	0.318015
210	path:mmu05330	Allograft rejection - Mus musculus (mouse)	0.317276
148	path:mmu04660	T cell receptor signaling pathway - Mus musculus (mouse)	0.316987
8	path:mmu00061	Fatty acid biosynthesis - Mus musculus (mouse)	0.314663
162	path:mmu04910	Insulin signaling pathway - Mus musculus (mouse)	0.31378
18	path:mmu00232	Caffeine metabolism - Mus musculus (mouse)	0.310973
136	path:mmu04530	Tight junction - Mus musculus (mouse)	0.309661
78	path:mmu00900	Terpenoid backbone biosynthesis - Mus musculus (mouse)	0.309357
58	path:mmu00592	alpha-Linolenic acid metabolism - Mus musculus (mouse)	0.30811
130	path:mmu04360	Axon guidance - Mus musculus (mouse)	0.308106
55	path:mmu00565	Ether lipid metabolism - Mus musculus (mouse)	0.305272
131	path:mmu04370	VEGF signaling pathway - Mus musculus (mouse)	0.303297
143	path:mmu04622	RIG-I-like receptor signaling pathway - Mus musculus (mouse)	0.29749
145	path:mmu04630	Jak-STAT signaling pathway - Mus musculus (mouse)	0.296417
62	path:mmu00604	Glycosphingolipid biosynthesis - ganglio series - Mus musculus (mouse)	0.295231
11	path:mmu00072	Synthesis and degradation of ketone bodies - Mus musculus (mouse)	0.29502
152	path:mmu04670	Leukocyte transendothelial migration - Mus musculus (mouse)	0.294373
116	path:mmu04141	Protein processing in endoplasmic reticulum - Mus musculus (mouse)	0.293797
35	path:mmu00450	Selenoamino acid metabolism - Mus musculus (mouse)	0.29152
9	path:mmu00062	Fatty acid elongation in mitochondria - Mus musculus (mouse)	0.291039
195	path:mmu05212	Pancreatic cancer - Mus musculus (mouse)	0.290365
2	path:mmu00020	Citrate cycle (TCA cycle) - Mus musculus (mouse)	0.286978
197	path:mmu05214	Glioma - Mus musculus (mouse)	0.278277
139	path:mmu04612	Antigen processing and presentation - Mus musculus (mouse)	0.27648
132	path:mmu04510	Focal adhesion - Mus musculus (mouse)	0.275237
45	path:mmu00520	Amino sugar and nucleotide sugar metabolism - Mus musculus (mouse)	0.27234
33	path:mmu00410	beta-Alanine metabolism - Mus musculus (mouse)	0.271311
81	path:mmu00970	Aminoacyl-tRNA biosynthesis - Mus musculus (mouse)	0.268622
191	path:mmu05160	Hepatitis C - Mus musculus (mouse)	0.268297
151	path:mmu04666	Fc gamma R-mediated phagocytosis - Mus musculus (mouse)	0.267526
110	path:mmu04114	Oocyte meiosis - Mus musculus (mouse)	0.266711
186	path:mmu05142	Chagas disease - Mus musculus (mouse)	0.263338
208	path:mmu05320	Autoimmune thyroid disease - Mus musculus (mouse)	0.263295
160	path:mmu04744	Phototransduction - Mus musculus (mouse)	0.261153
164	path:mmu04914	Progesterone-mediated oocyte maturation - Mus musculus (mouse)	0.259999
190	path:mmu05150	Staphylococcus aureus infection - Mus musculus (mouse)	0.258673
204	path:mmu05221	Acute myeloid leukemia - Mus musculus (mouse)	0.258407
179	path:mmu05010	Alzheimer's disease - Mus musculus (mouse)	0.257938
96	path:mmu03320	PPAR signaling pathway - Mus musculus (mouse)	0.256444
19	path:mmu00240	Pyrimidine metabolism - Mus musculus (mouse)	0.255754
153	path:mmu04672	Intestinal immune network for IgA production - Mus musculus (mouse)	0.255568
22	path:mmu00270	Cysteine and methionine metabolism - Mus musculus (mouse)	0.255449
163	path:mmu04912	GnRH signaling pathway - Mus musculus (mouse)	0.250684
91	path:mmu03022	Basal transcription factors - Mus musculus (mouse)	0.249678
92	path:mmu03030	DNA replication - Mus musculus (mouse)	0.249027
212	path:mmu05340	Primary immunodeficiency - Mus musculus (mouse)	0.245998
207	path:mmu05310	Asthma - Mus musculus (mouse)	0.243625
34	path:mmu00430	Taurine and hypotaurine metabolism - Mus musculus (mouse)	0.237972
66	path:mmu00650	Butanoate metabolism - Mus musculus (mouse)	0.233754
149	path:mmu04662	B cell receptor signaling pathway - Mus musculus (mouse)	0.233043
166	path:mmu04920	Adipocytokine signaling pathway - Mus musculus (mouse)	0.23276
202	path:mmu05219	Bladder cancer - Mus musculus (mouse)	0.231106
13	path:mmu00120	Primary bile acid biosynthesis - Mus musculus (mouse)	0.228477
134	path:mmu04514	Cell adhesion molecules (CAMs) - Mus musculus (mouse)	0.222882
17	path:mmu00230	Purine metabolism - Mus musculus (mouse)	0.217624
109	path:mmu04110	Cell cycle - Mus musculus (mouse)	0.216698
198	path:mmu05215	Prostate cancer - Mus musculus (mouse)	0.215768
86	path:mmu01100	Metabolic pathways - Mus musculus (mouse)	0.214119
176	path:mmu04972	Pancreatic secretion - Mus musculus (mouse)	0.208176
46	path:mmu00524	Butirosin and neomycin biosynthesis - Mus musculus (mouse)	0.207028
146	path:mmu04640	Hematopoietic cell lineage - Mus musculus (mouse)	0.206502
74	path:mmu00785	Lipoic acid metabolism - Mus musculus (mouse)	0.205555
209	path:mmu05322	Systemic lupus erythematosus - Mus musculus (mouse)	0.204705
133	path:mmu04512	ECM-receptor interaction - Mus musculus (mouse)	0.200024
128	path:mmu04340	Hedgehog signaling pathway - Mus musculus (mouse)	0.199358
60	path:mmu00601	Glycosphingolipid biosynthesis - lacto and neolacto series - Mus musculus (mouse)	0.198444
114	path:mmu04130	SNARE interactions in vesicular transport - Mus musculus (mouse)	0.197309
178	path:mmu04974	Protein digestion and absorption - Mus musculus (mouse)	0.195274
216	path:mmu05416	Viral myocarditis - Mus musculus (mouse)	0.192065
25	path:mmu00300	Lysine biosynthesis - Mus musculus (mouse)	0.184803
168	path:mmu04940	Type I diabetes mellitus - Mus musculus (mouse)	0.183221
14	path:mmu00130	Ubiquinone and other terpenoid-quinone biosynthesis - Mus musculus (mouse)	0.181409
26	path:mmu00310	Lysine degradation - Mus musculus (mouse)	0.178702
144	path:mmu04623	Cytosolic DNA-sensing pathway - Mus musculus (mouse)	0.178217
115	path:mmu04140	Regulation of autophagy - Mus musculus (mouse)	0.171093
21	path:mmu00260	Glycine, serine and threonine metabolism - Mus musculus (mouse)	0.154506
192	path:mmu05200	Pathways in cancer - Mus musculus (mouse)	0.130902
