# Supplementary material for: Biological Networks for Predicting Chemical Hepatocarcinogenicity Using Gene Expression Data from Treated Mice and Relevance across Human and Rat Species
Source: PLoS One. 2013 May 30;8(5):e63308. doi: 10.1371/journal.pone.0063308 (PMC3667849; doi:10.1371/journal.pone.0063308)
Supplement: Table S3 — List of various learning algorithms attempted in the SuperLearner package [35] and the cross-validated risk for the case of pathway-based continuous predictions. (XLS) [file pone.0063308.s005.xls]

## Sheet: S2
Supplementary Table 4. List of chemicals in Table 1 that were chosen to be in each of the 5 folds in the cross-validation analysis performed
Fold-1	abdq, vanp, pgbe, nedd, coum, dbet
Fold-2	dcbz, tfea, macr, diaz, mala
Fold-3	napd, naac, tdpp, cmph, bbmp
Fold-4	bfur, etox, tfel, npth, pcnb
Fold-5	mecl, iodo, tcpn, tcfm, benz
